# Supplementary material
Source: PubMed Central journal article supplement (PMC6881516)

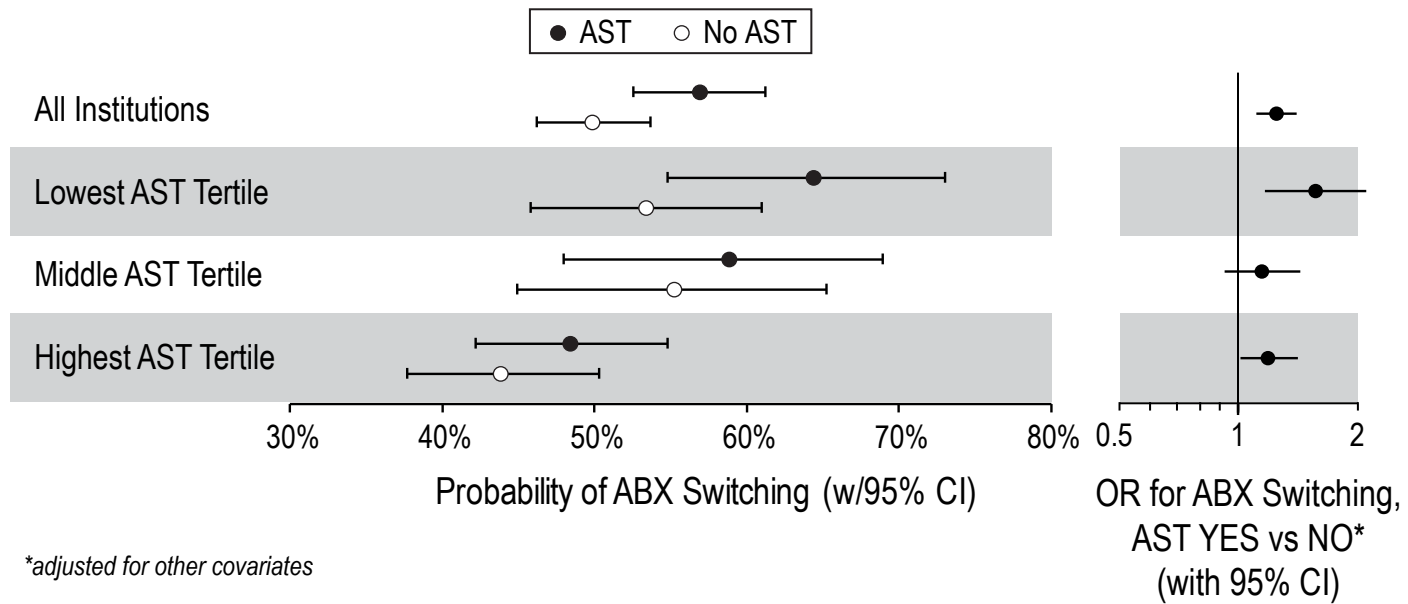

Supplement: NIHMS1034130-supplement-Supp_Fig_1.pdf [file NIHMS1034130-supplement-Supp_Fig_1.pdf]

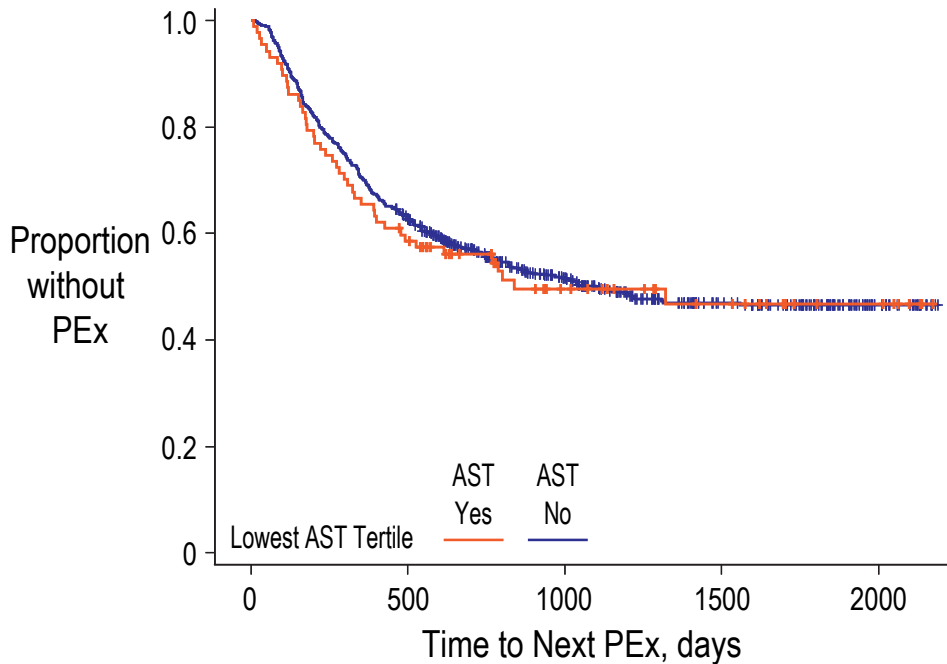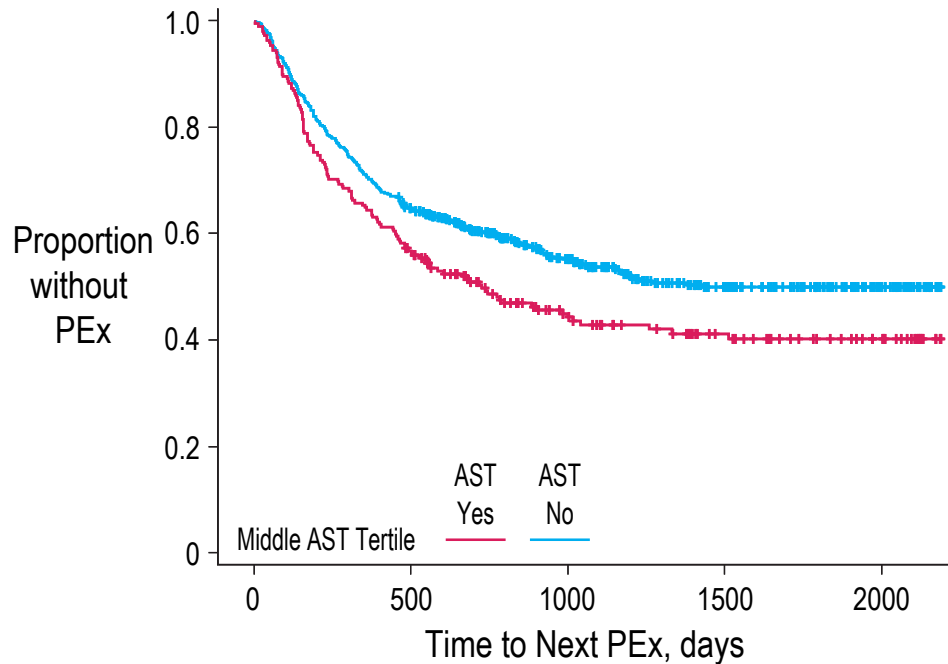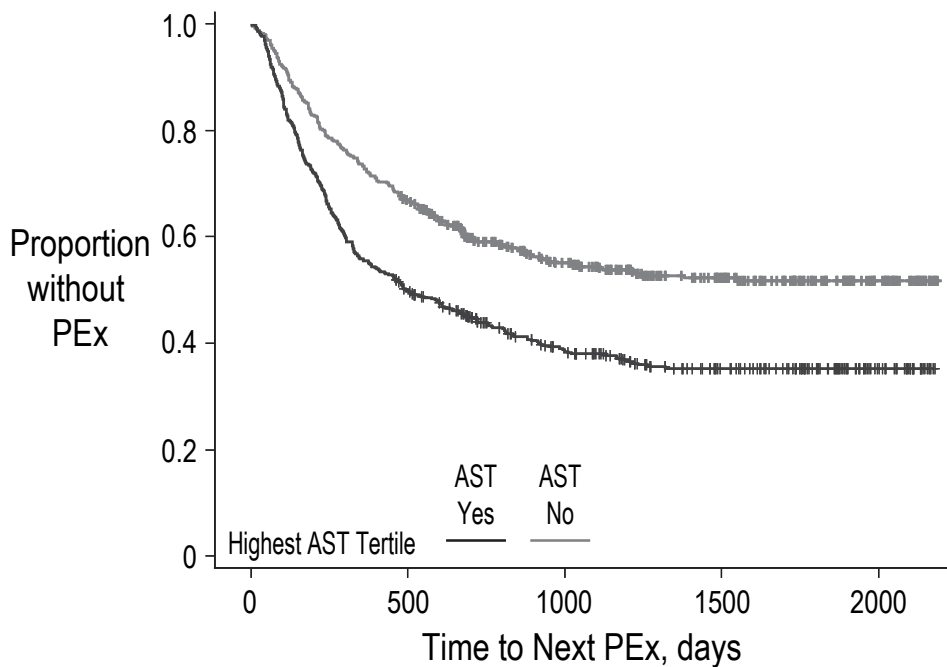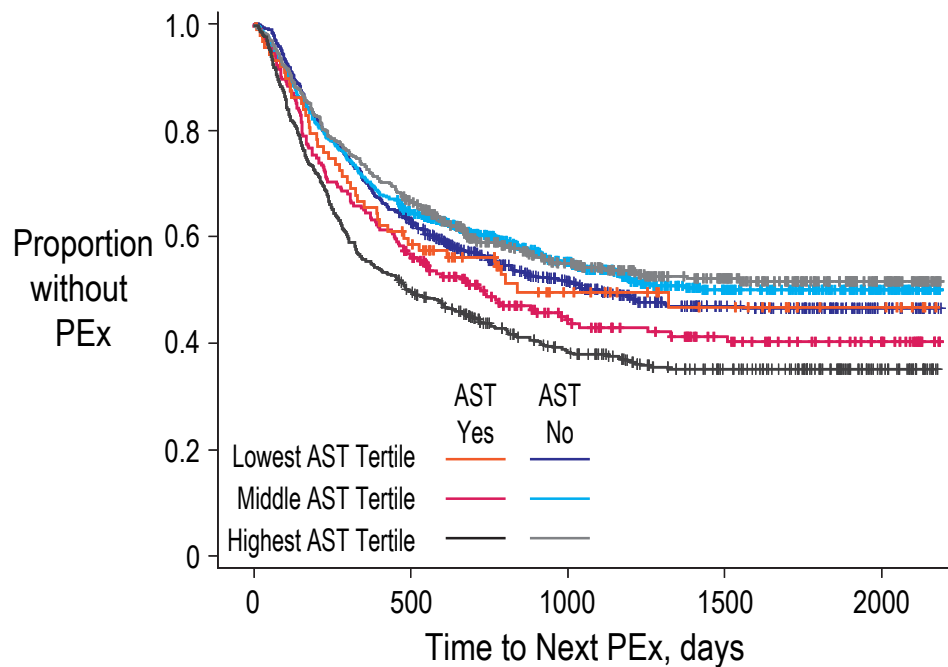

Supplement: NIHMS1034130-supplement-Supp_Fig_3.pdf [file NIHMS1034130-supplement-Supp_Fig_3.pdf]
